# Supplementary material for: Seasonal forecasting skill for the High Mountain Asia region in the Goddard Earth Observing System
Source: Copernicus journal article supplement (doi:10.5194/esd-14-147-2023), 2023-02-08
Supplement: Supplementary file 1 [file esd-14-147-2023-supplement.pdf]

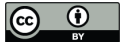

*Supplement of*

## **Seasonal forecasting skill for the High Mountain Asia region in the Goddard Earth Observing System**

**Elias C. Massoud et al.**

*Correspondence to:* Elias C. Massoud ([massoudec@ornl.gov](mailto:massoudec@ornl.gov))

The copyright of individual parts of the supplement might differ from the article licence.

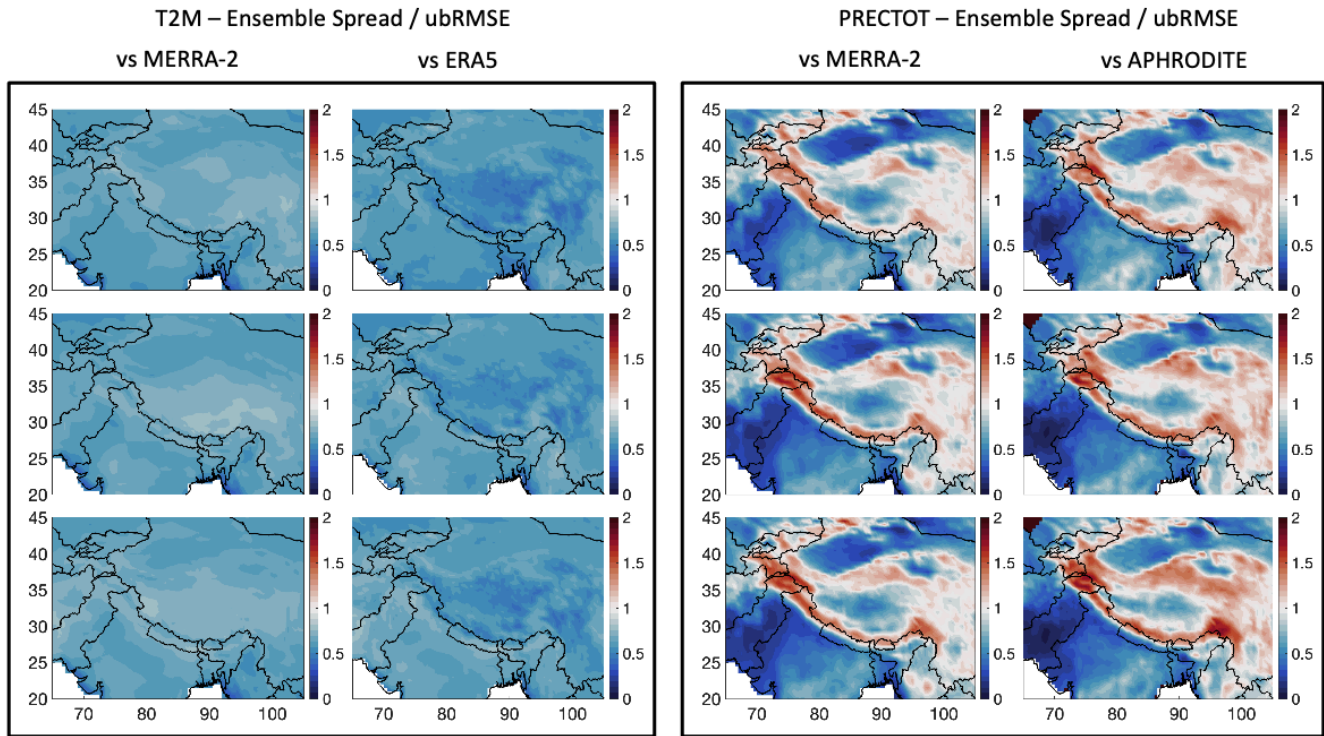

15

Figure S1: These plots show the reliability of the S2S forecasts for T2M and PRECTOT, calculated as the ensemble spread divided by the ubRMSE, information that can be found in Figures 7-8. For these plots, blue indicates the forecasts are overconfident for that region, meaning there is a smaller spread compared to what the error is. Red shows the opposite, indicating that the forecasts are underconfident for that region, which means there is a larger spread compared to what the error is. The rows of plots show the 1-month (top), 2-month (center), and 3-month (bottom) forecasts.

20

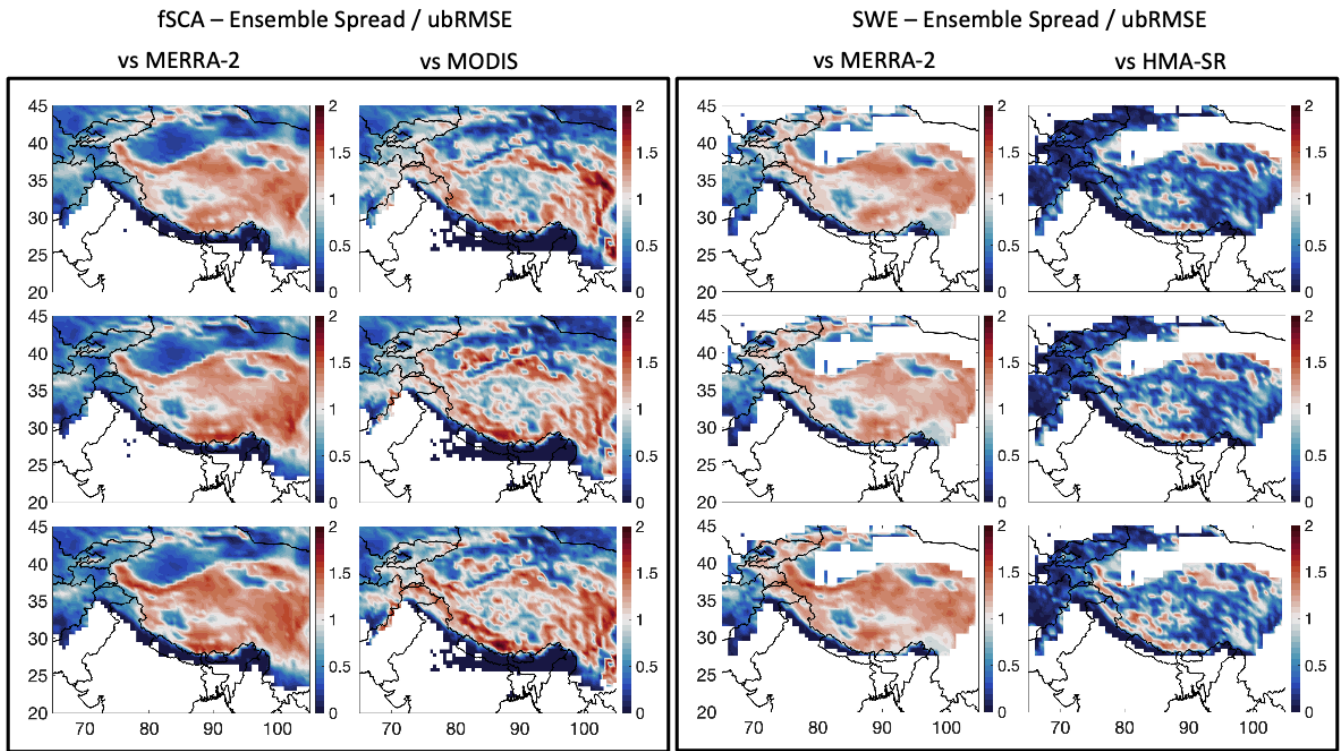

25 **Figure S2:** These plots show the reliability of the S2S forecasts for fSCA and SWE, calculated as the ensemble spread divided by the ubRMSE, information that can be found in Figures 9-10. For these plots, blue indicates the forecasts are overconfident for that region, meaning there is a smaller spread compared to what the error is. Red shows the opposite, indicating that the forecasts are underconfident for that region, which means there is a larger spread compared to what the error is. The rows of plots show the 1-month (top), 2-month (center), and 3-month (bottom) forecasts.

30

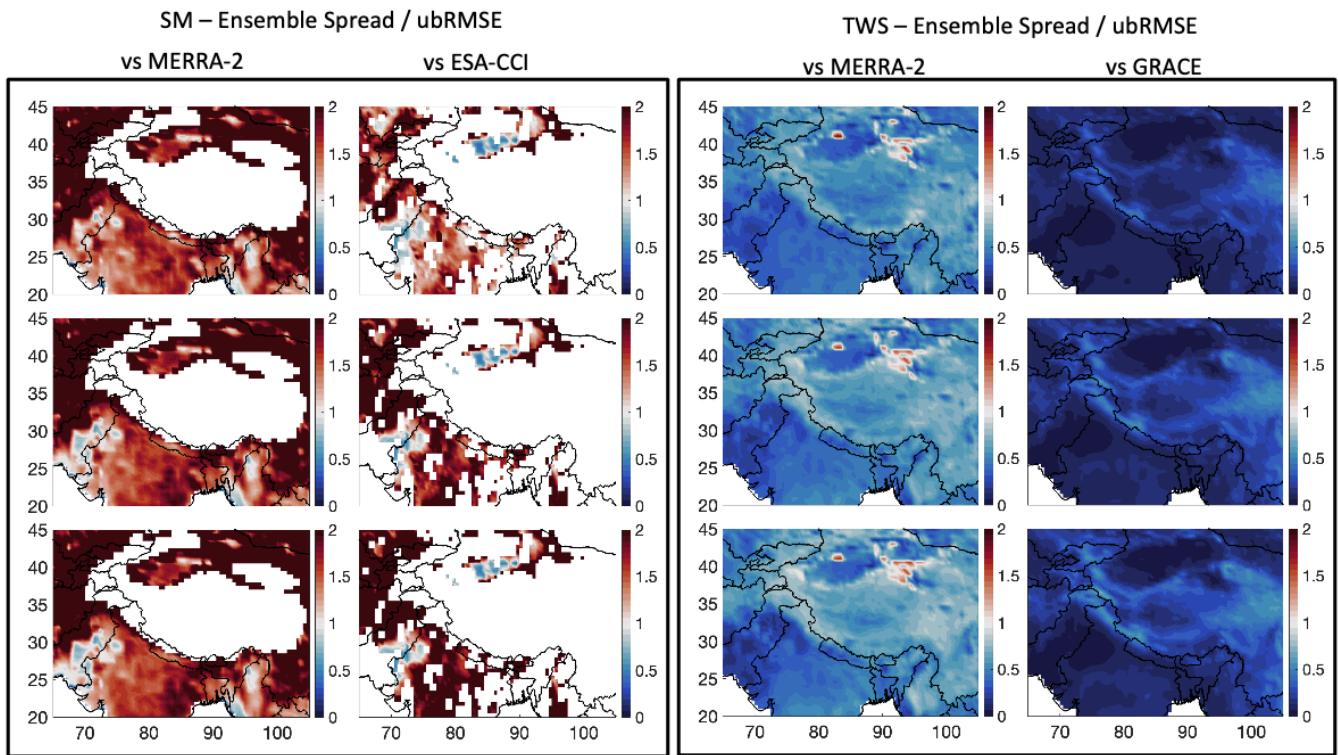

35

Figure S3: These plots show the reliability of the S2S forecasts for SM and TWS, calculated as the ensemble spread divided by the ubRMSE, information that can be found in Figures 11-12. For these plots, blue indicates the forecasts are overconfident for that region, meaning there is a smaller spread compared to what the error is. Red shows the opposite, indicating that the forecasts are underconfident for that region, which means there is a larger spread compared to what the error is. The rows of plots show the 1-month (top), 2-month (center), and 3-month (bottom) forecasts.
